1 **Recovery from form-deprivation myopia in chicks is dependent upon the fullness and**  
2 **correlated colour temperature of the light spectrum**

3

4 Arumugam R. Muralidharan<sup>1</sup>, Low Wan Yu Shermaine<sup>1</sup>, Lee Yong Chong<sup>1</sup>, Veluchamy A.  
5 Barathi<sup>1,2,3</sup>, Seang-Mei Saw<sup>1,2,4</sup>, Dan Milea<sup>1,2,5</sup>, Raymond P. Najjar<sup>1,2\*</sup>

6

7 <sup>1</sup> Singapore Eye Research Institute, Singapore, 169856; <sup>2</sup> The Ophthalmology & Visual  
8 Sciences ACP (EYE-ACP), SingHealth and Duke-NUS, Singapore, 169857; <sup>3</sup> Department of  
9 Ophthalmology, Yong Loo Lin School of Medicine, National University of Singapore,  
10 Singapore; <sup>4</sup> Saw Swee Hock School of Public Health, National University of Singapore,  
11 Singapore; <sup>5</sup> Singapore National Eye Centre, Singapore, 168751.

12

13 \* Corresponding author

14

15 **Keywords:** Myopia, full-spectrum light, correlated colour temperature, axial length, sclera,  
16 choroid, animal models.

17

18

19

20

21 **Correspondence and reprint requests to:**

22 Dr. Raymond P. Najjar,  
23 Singapore Eye Research Institute  
24 The Academia, 20 College Road  
25 Discovery Tower Level 6  
26 Singapore 169856  
27 Email: [raymond.najjar@seri.com.sg](mailto:raymond.najjar@seri.com.sg)

28

29

30 Word Count: 4718 words

## 1 **Abstract**

## 2 **Background**

3 To evaluate the impact of full-spectrum light-emitting diodes (LEDs) mimicking  
4 sunlight on ocular axial elongation and refractive error development in a chicken model of  
5 myopia.

## 6 **Methods**

7 A total of 39 chicks (Lohmann brown), 1 day-old, were randomly distributed into 3  
8 groups. Animals were housed for 28 days in a temperature-controlled enclosure, under a  
9 12/12h light/dark cycle of isoluminant (~285 Lux) fluorescent [n = 18, (4000K, FL-4000)] or  
10 Sunlike-LED [n=12, (4000K, SL-4000); n = 9, (6500K, SL-6500)] white lights. Myopia was  
11 induced monocularly in all chicks by random occlusion of one eye with a frosted diffuser,  
12 from day 1 post-hatching (D1) until D14. On D14, diffusers were removed, and recovery  
13 from myopia was monitored under the same experimental light condition. Axial length (AL),  
14 refractive status, choroidal thickness and anterior chamber depth were recorded on days 1, 7,  
15 14, 22 and 28. *Ex vivo* scleral collagen fibre thicknesses were measured from scanning  
16 electron microscopy images. Differences in outcome measures between eyes and groups were  
17 compared using 2-way repeated-measures ANOVA.

## 18 **Results**

19 There was no significant difference between groups in the AL and refraction of form-  
20 deprived (FD) eyes during form-deprivation (D1 to D14). FD eyes of animals raised under  
21 SL-4000 and SL-6500 recovered more rapidly from excessive axial elongation than those of  
22 animals raised under FL-4000, by D22 and D28. Correspondingly, the refractive status of FD  
23 eyes exposed to SL-4000 and SL-6500 was close to that of control eyes by D28. The choroid  
24 became thicker during recovery in FD eyes compared to control eyes, in all groups. Choroidal  
25 thickness was significantly greater in FD eyes of chickens raised under SL-6500 than in

1 animals raised under FL-4000 ( $P < 0.01$ ). The diameter of scleral collagen fibrils was  
2 significantly greater in recovering FD eyes of chickens raised under SL-6500, than in those  
3 raised under FL-4000 ( $P = 0.04$ ) and SL-4000 ( $P = 0.002$ ).

#### 4 **Conclusions**

5 Compared to fluorescent light, moderate intensities of full-spectrum Sunlike-LEDs  
6 can accelerate recovery from form-deprivation myopia in chickens, potentially through  
7 choroid-mediated pathways increasing the diameter of scleral collagen fibrils. This study  
8 highlights an important implication of the spectral content of white light on ocular growth  
9 and emmetropization.

10

## 1 **Background**

2 Myopia is due to a failure in matching the axial length of the eye to the focusing  
3 power of its optics, during eye growth, which causes images of distant objects to be focussed  
4 in front of the retinal photoreceptors [1]. The prevalence of myopia is steadily rising, and it is  
5 estimated that almost 50% of world's population will be myopic by 2050 [2] making this  
6 condition a major socio-economic burden [3]. For instance, in Singapore, 69% of people are  
7 myopic by 15 years of age, and approximately US\$755 million [4] is spent on optical  
8 correction for myopia annually. In East Asia and South East Asia, nearly 95% of the  
9 population depends on eyeglasses or contact lenses [5,6]. Although blurred vision can be  
10 corrected with glasses, lenses or refractive surgery, there are still risks of blindness from  
11 pathologies associated with high myopia [7].

12 With the strong need to delay myopia onset or slow its progression, several different  
13 approaches have been proposed, including increasing time spent outdoors by children [8].  
14 Recent studies have shown that children who spend more time outdoors have a lower risk of  
15 developing myopia and experience a reduction in myopia progression [9–13]. Guggenheim *et*  
16 *al.* [14] have shown that the protective effects of outdoor exposure are independent of  
17 physical activity, while Donovan *et al.* [15] have found myopia progression to be slower  
18 during the summer, possibly because of increased outdoor exposure.

19 According to Lingham *et al.* [16], the protective effect of outdoor light against  
20 myopia is most likely due to one or both of the following factors (which are potentially sub-  
21 optimal in indoor lighting): 1) high light intensity and 2) favourable spectral composition of  
22 light. Apart from this, circadian rhythm and spatial frequency characteristics of the visual  
23 environment are also considered as potential cues; however, there has been limited clinical  
24 investigation of this notion [16]. The direct illumination from the sun at noon can rise above  
25 130,000 lux, whilst that in shaded areas outdoors can range from 15,000 to 25,000 lux [17].

1 Recently, lower levels of light, from 5556 to 7876 lux, have also been found in the shade  
2 under trees, while an open-field light intensity during different times of day was reported to  
3 range from 11,080 to 18,176 lux in cloudy conditions [18]. In comparison, indoor  
4 illumination usually ranges between 100 and 500 lux [17]. The spectral composition of  
5 sunlight also differs from that of artificial indoor lighting. Sunlight has a full spectrum that  
6 includes wavelengths ranging from ~300 nm to ~1200 nm, whilst standard fluorescent indoor  
7 lights, for example, emit wavelengths ranging from ~400 nm to ~700 nm in a spiked  
8 distribution, peaking in blue, red and green [19]. Furthermore, the correlated colour  
9 temperature (CCT) of sunlight is dynamic throughout the day, ranging from ~2,000K at  
10 sunrise or sunset to over 10,000K on a clear blue sky at mid-day.

11 Several experimental studies using animal models have highlighted the importance of  
12 the spectral composition of light on axial ocular growth and myopia development [20,21].  
13 For instance, chickens [20], and guinea pigs [22] raised in longer wavelengths of light are  
14 more susceptible to ocular axial elongation and increased myopia, while exposure to  
15 monochromatic short-wavelength blue lights either induces hyperopia or protects against  
16 myopia development, in chicks [21], guinea pigs [23], and some rhesus monkeys [24].  
17 Conversely, exposure to long wavelength monochromatic lights has also been reported to be  
18 protective against myopia in rhesus monkeys [25]. To date, the impact of the spectral  
19 distribution of artificial white light on refractive error development remains under-  
20 investigated.

21 In this study, we evaluated the impact of moderate intensities of light-emitting diodes  
22 (LEDs) with two different CCTs having full, sunlight-like emission spectra, on ocular growth  
23 and myopia development and recovery in a chicken model of form-deprivation myopia.

## 24 **Methods**

### 25 **Animals and Experimental Paradigms**

1           One-day-old (D1) male Lohmann Brown chicks were obtained from a hatchery in  
2 Malaysia and were raised in a temperature-controlled enclosure ( $31 \pm 1.5^{\circ}\text{C}$ ) with food and  
3 water *ad libitum*. Monocular form-deprivation myopia was induced by placing a 3D-printed  
4 translucent diffuser over one randomly selected eye. Diffusers were secured around the  
5 chicken's eye using velcro rings, and were inspected twice daily during the 12 h light period  
6 to ensure cleanliness. Contralateral eyes remained uncovered and served as controls.

7           Chicks were reared under a 12:12 hour light/dark cycle (0700-1900h) from day one  
8 (D1) until D29. On D1, chickens were randomly divided into three groups based on the  
9 spectrum and CCT of isoluminant ambient lighting conditions: Group FL-4000 (n=18) was  
10 reared under fluorescent light having a CCT of 4000K (T5 fluorescent tubes, OSRAM  
11 GmbH, Munich, Germany); Group SL-4000 (n=12) was reared under a full-spectrum SL  
12 LEDs having a CCT of 4000K (T5 Sunlike LEDs, Seoul Semiconductor Co Ltd, Gyeonggi-  
13 do, South Korea); and Group SL-6500 (n=9) was reared under a full-spectrum SL LEDs  
14 having CCT of 6500K (T5 Sunlike LEDs, Seoul Semiconductor Co Ltd, Gyeonggi-do, South  
15 Korea). Light fixtures were controlled by a Helvar DIGIDIM 910 router (Helvar, Dartford  
16 Kent, United Kingdom). The spectral composition of the lights (fluorescent and sunlike) were  
17 assessed using a calibrated spectroradiometer ILT950 (International Light Technologies, MA,  
18 USA). The spectral composition of daylight/sunlight were assessed using CAS 140B-152  
19 spectrometer (Instrument Systems GmbH, Munich, Germany) to compare with the spectrum  
20 of Sunlike LEDs. Average light intensities were calibrated at the chicken eye level in all  
21 directions of gaze using a calibrated ILT 5000 radiometer (International Light Technologies,  
22 MA, USA). (Figure 1)

23

24

25   **Ocular measurements *in vivo***

1 Ocular axial length (AL), non-cycloplegic refraction, choroid and retina thicknesses  
2 and anterior chamber depth (ACD) were measured in the three experimental groups on D1,  
3 D7, D14, D22 and D28. Baseline ocular parameters were measured on D1 before the  
4 application of the diffusers. During the form-deprivation period, the diffusers were removed  
5 on D7 and D14 for a brief period to perform ocular measurements. All measurements were  
6 carried out on a non-anesthetized

### 7 **Axial Length**

8 AL was measured *via* A-scan ultrasonography using a PacScan Plus  
9 (SonomedEscalon, NY, USA) at 10 MHz frequency. AL is defined as the distance between  
10 the echo spike corresponding to the anterior surface of the cornea and most anterior spike  
11 originating from the retina. The median of at least five scans was calculated per eye for each  
12 animal.

### 13 **Refraction**

14 An automated version of infrared photoretinoscopy was used to measure non-  
15 cycloplegic refraction of the chicken's eye, as previously described by Schaeffel & Howland  
16 [26]. Using an adjustable platform, chicks were gently positioned ~1 meter away from the  
17 infrared photoretinoscopy. The median of multiple (3-5) measurements during resting  
18 refraction was recorded and utilized in this study.

### 19 **Choroidal and retinal thicknesses**

20 Spectral-domain optical coherence tomography (SD-OCT) (Spectralis, Heidelberg  
21 Engineering, Inc., Heidelberg, Germany) was used to image the posterior segment of the eye  
22 following the protocol adopted by Lan et al. [49]. Choroidal and retinal thicknesses were  
23 measured using the Spectralis OCT reviewer software (Heidelberg Eye Explorer, Version  
24 1.10.2.0, Heidelberg, Germany). The average of five measurements per image was utilized in  
25 this study.

1

## 2           **Anterior chamber depth**

3           ACD was measured using the RTVue anterior segment OCT (Optovue, Inc., Fremont,  
4 CA, USA). An additional corneal lens adapter (cornea anterior module-low magnification  
5 [CAM-L]) was attached and the ‘desaturate’ function was enabled for better visualization.  
6 Scans of 6 x 6 mm were obtained throughout the study. Imaging was carried out along the  
7 nasal-temporal axis.

8

## 9           **Ocular measurements *ex vivo***

10           To evaluate the impact of study lights on scleral collagen remodelling, animals were  
11 euthanized on D29 after completion of the *in vivo* measurements, by administering 2.5mg/kg  
12 bodyweight of pentobarbitone sodium (Jurox Pte. Ltd, Rutherford, NSW, Australia) through  
13 intraperitoneal injection. Death was further confirmed through cervical dislocation. The eyes  
14 were enucleated and scleral strips of 5-10 mm length and 3 mm width were dissected from  
15 the posterior pole of all experimental animals. These flat-mounted strips were fixed in 3%  
16 paraformaldehyde (Sigma-Aldrich, Merck, St Louis, USA) with 1.5% glutaraldehyde (Ted  
17 Pella, inc., Redding, CA, USA) and stored overnight in fixative at 4°C.

## 18           **Field Emission Scanning Electron Microscopy (FE-SEM)**

19           For FE-SEM analysis, the fixed scleral strips were dehydrated in 30%, 50%, 70%,  
20 80%, and 90% ethanol for 10 minutes each, followed by 15 minutes in 95% and 100%  
21 ethanol and 5 minutes in hexamethyldisilazane (HMDS, Sigma-Aldrich, Merck, St Louis,  
22 USA). Samples were left to air-dry overnight in a biosafety cabinet prior to mounting on  
23 electron microscope stubs covered with carbon tape. FE-SEM analysis using the Quanta 200F  
24 (JEOL – JSM6701F, Lireweg, The Netherlands) was then carried out after sputter-coating  
25 with platinum (JEOL JSC-1200 fine coater, Japan) at an accelerating voltage of 15 kV. The



1 fibrous layer of the sclera was imaged. However, this procedure was carried out through the  
2 interior surfaces of the scleral strips since residual adhering extraocular muscles interfered  
3 with the imaging procedure. Using the micrographs produced by the FE-SEM, average fiber  
4 diameter was calculated using ImageJ (National Institutes of Health, USA). Reported values  
5 are the average of measurements from 9 randomly selected fibres in the same scleral tissue.

6

## 7 **Data Analysis**

8 Results are presented as average  $\pm$  standard deviation (SD). Changes in the measured  
9 parameters (AL, refraction, choroidal and retinal thicknesses, ACD) of the FD eye over the  
10 duration of experimental procedure (D1 to D28) were compared to control eyes (within each  
11 experimental group) then expressed as the differences between the FD and the control eye  
12 then compared between experimental groups. After confirming normal distribution of the  
13 variables, ocular parameters and differences in inter-ocular parameters were compared  
14 between eyes within the same group and between groups using a 2-way repeated-measures  
15 analysis of variance (2-way repeated measures (RM)-ANOVA) with time and eye or time and  
16 group as within- and between-subject factors, respectively. Whole-body weights of animals  
17 in different groups were also compared using a 2-way RM-ANOVA. For those comparisons  
18 in which the omnibus test reached statistical significance, pairwise multiple comparison  
19 procedures were performed using the Holm-Sidak method. Multiple *t*-test was used to  
20 analyse the scleral thickness data obtained through FE-SEM. For all statistical tests the level  
21 of significance was set at  $p < 0.05$ , and for post-hoc analysis the Holm-Sidak correction was  
22 applied. Statistics were performed using Sigmaplot 14.0 (Systat Software, Inc., San Jose, CA,  
23 USA), and plots were drawn using GraphPad Prism 6 (GraphPad Software, La Jolla CA,  
24 USA).

25

1

## 2 **Results**

### 3 **Characteristics of the experimental lights**

4 Average illuminances, measured in all directions of gaze within the enclosure, were  
5 maintained at 281.8 lux (range: 155-727 lux, FL-4000), 284.5 lux (range: 150-711 lux, SL-  
6 4000) and 287.9 lux (range: 161-727 lux, SL-6500) throughout the experimental period. The  
7 illuminance was highest when the animal was staring directly at the overhead light source.  
8 The spectra of SL LEDs (4000K and 6500K) were similar to that of outdoor sunlight/daylight  
9 [DL (4000K and 6500K)], being broader and more homogeneously distributed than that of  
10 FL-4000, which was discontinuous – having sharp, spike-like peaks at ~435, 550 and 620 nm  
11 (Figure 1A and B). The total energy delivered at these peak wavelengths was much greater  
12 for FL-4000 than for the LED sources; however, FL-4000 delivered much higher energy than  
13 the LEDs near the  $\lambda_{\max}$  of chicken UVS- and SWS-cones (ca. 420 and 455 nm, respectively),  
14 but energy comparable to that of the LEDs at the  $\lambda_{\max}$  of LWS-cones (ca. 570 nm), and  
15 considerably less than that of the LEDs at the  $\lambda_{\max}$  of MWS-cones (ca. 510 nm) (Figure 1A)  
16 [27]. The average relative spectral transmittance of form-deprivation diffusers at the level of  
17 chicken eye was almost the same across the entire visible spectrum, except at the shortest  
18 wavelengths ( $\leq 425$  nm) (Figure 1C).

19

### 20 **Change in body weight of experimental groups**

21 The average weights of the animals raised under both FL and full-spectrum SL lights  
22 were similar ( $P > 0.05$ ) throughout the experimental protocol (Supplementary figure S1).

23

### 24 **Impact of full spectrum LEDs on ocular axial length**

1           The axial lengths of form-deprived (FD) eyes of animals raised under all three  
2 lighting conditions were significantly greater overall than those of control eyes (FL-4000: [ $F$   
3 (1,34) = 87.61,  $P < 0.001$ ]; SL-4000: [ $F$  (1,22) = 19.07,  $P < 0.001$ ] and SL-6500; [ $F$  (1,16) =  
4 25.75,  $P < 0.001$ ]), and significant differences were seen FD in all groups from D7 to D14  
5 (Figure 2A, B, C). Following the end of form-deprivation (D14), between D14 and D28, FD  
6 eyes exposed to SL-4000 and SL-6500 recovered more rapidly from excessive axial  
7 elongation than did FD eyes exposed to FL-4000 (Figure 2A, B, C). By D28, the differences  
8 between AL of FD eyes in animals raised under SL-4000 ( $P = 0.14$ ) and SL-6500 ( $P = 0.34$ ),  
9 compared to control eyes, were no longer statistically significant; whereas in chicks reared  
10 under FL, the AL of recovered FD eyes was still  $0.91 \pm 0.70$  mm longer than that of control  
11 eyes, on D28 (Figure 2D) ( $P < 0.001$ ).

12           The inter-ocular difference in AL was significantly greater overall in the FL-4000 group than  
13 in the SL groups (( $F$  (2,36) = 4.54,  $P = 0.02$ ; FL-4000 vs SL-4000 ( $P = 0.04$ ), and FL-4000  
14 vs SL-6500 ( $P = 0.049$ )), but was not significantly different between the SL groups (Figure  
15 2D). This difference was dependent on the time of the experiment ( $F$  (8,144) = 5.13,  $P <$   
16 0.001; viz., on D22 and D28 the average inter-ocular difference in AL of FD eyes exposed to  
17 SL-4000 (D22:  $P < 0.001$ ; D28:  $P < 0.001$ ) and SL-6500 (D22:  $P = 0.006$ ; D28:  $P < 0.001$ )  
18 was significantly smaller than in eyes exposed to FL-4000 (Figure 2D). The ALs of control  
19 eyes exposed to FL-4000, SL-4000, or SL-6500 were not significantly ( $P > 0.05$ ) different  
20 throughout the experimental period.

21

## 22 **Impact of full spectrum LEDs on refractive error**

23           In all groups, the spherical equivalent refractive error of FD eyes exhibited a  
24 significant myopic shift compared to control eyes (FL-4000: [ $F$  (1,34) = 244.44,  $P < 0.001$ ];  
25 SL-4000: [ $F$  (1,22) = 148.35,  $P < 0.001$ ] and SL-6500; [ $F$  (1,16) = 29.44,  $P < 0.001$ ]),

1 especially during the form-deprivation period (D7 and D14; Figure 3A-C). Following the end  
2 of myopia recovery (D28), the refractions of FD eyes of animals raised under SL-6500  
3 recovered to values similar to those of control eyes (Figure 3C) ( $P = 0.14$ ), whereas the  
4 refractions of FD eyes of animals raised under FL-4000 (Figure 3A) ( $P < 0.001$ ) or SL-4000  
5 (Figure 3B) ( $P = 0.04$ ) remained significantly different from those of the fellow control eyes.  
6 The inter-ocular differences in refraction between the three groups were not significantly  
7 different ( $(F(2,36) = 1.76, P = 0.19; FL-4000 \text{ vs } SL-4000 (P = 0.39) \text{ and } FL-4000 \text{ vs } SL-$   
8  $6500 (P = 0.24))$  (Figure 3D). The spherical equivalent refractions of fellow control eyes in  
9 chicks exposed to FL-4000, SL-4000 or SL-6500 were not significantly different at any time.

10

### 11 **Impact of full spectrum LEDs on choroidal and retinal thickness measurements**

12 In all groups, the choroidal thickness of FD eyes overall was different from that of  
13 fellow control eyes (FL-4000: [ $F(1,34) = 27.63, P < 0.001$ ]; SL-4000: [ $F(1,22) = 76.52, P <$   
14  $0.001$ ] and SL-6500; [ $F(1,16) = 145.97, P < 0.001$ ]) (Figures 4A, B, C). At specific times,  
15 choroidal thickness was greater in FD than in control eyes, on D7 ([FL-4000,  $P = 0.04$ ]; [SL-  
16 4000,  $P = 0.02$ ]) and D14 ([FL-4000,  $P = 0.02$ ]; [SL-4000,  $P = 0.03$ ]) (Figure 4A, B); in FD  
17 eyes exposed to SL-6500, however, no significant choroidal thinning was observed during the  
18 FD period (Figure 4C). After termination of FD at D14, choroidal thickness increased  
19 dramatically in the previously-FD eyes exposed to FL-4000, SL-4000 and SL-6500,  
20 compared to control eyes (Figure 4A-C), resulting in significantly higher overall inter-ocular  
21 differences in choroidal thickness of FD eyes than in the SL-6500 group or the FL-4000  
22 group ( $F(2,36) = 3.92, P = 0.03$ ), but no significant differences between choroidal  
23 thicknesses in the two SL groups (Figure 4D). Choroidal thickening of the FD eyes under SL-  
24 6500 was independent of the time of the experiment. Choroidal thicknesses of control eyes  
25 exposed to FL-4000, SL-4000, or SL-6500 were not significantly different at any time.

1           The retina, too, became significantly thinner by D14 in FD eyes than fellow control  
2 eyes, in animals raised under FL-4000, SL-4000 and SL-6500 (FL-4000 [ $P < 0.001$ ]; SL-  
3 4000 [ $P < 0.001$ ] and SL-6500 [ $P < 0.001$ ]), while at D7, retinal thinning was found only in  
4 the FD eyes of animals raised under FL-4000 ( $P < 0.001$ ) (Supplementary Figure S2A, B).  
5 This effect was completely reversed by 8-14 days (D22 and D28, respectively) after diffuser  
6 removal on D14, wherein the retinal thickness in FD eyes of all three groups was similar to  
7 that in control eyes (Supplementary Figure S2). Inter-ocular differences in retinal thickness in  
8 the 3 groups were not significantly different (Supplementary Figure S2D). The retinal  
9 thicknesses of control eyes in the 3 groups were not significantly different.

10

#### 11 **Impact of full spectrum LEDs on anterior chamber depth**

12           Under all three lighting conditions, ACD was significantly greater in FD eyes than in  
13 control eyes (FL-4000: [ $F(1,34) = 24.56, P < 0.001$ ]; SL-4000: [ $F(1,22) = 26.96, P < 0.001$ ]  
14 and SL-6500; [ $F(1,16) = 18.49, P < 0.001$ ]) (Figure 5A, B, C). Inter-ocular differences in  
15 ACD in the three lighting groups FD were not significantly ( $P > 0.05$ ) different throughout  
16 the experimental period (Figure 5D).

17

#### 18 **Scleral collagen fibre remodelling in eyes exposed to SL6500**

19           The FE-SEM analysis reveals that the collagen fibres of recovering FD eyes exposed  
20 to SL-6500 were significantly thicker than fibres of recovering FD eyes exposed to FL-4000  
21 ( $P = 0.04$ ) or SL-4000 ( $P = 0.002$ ). The thicknesses of collagen fibre in the control eyes of  
22 different study groups were not significantly different (Figure 6A-D). No significant  
23 difference ( $P > 0.05$ ) was observed between recovering FD eyes exposed to SL-4000 and FL-  
24 4000 (Figure 6E-H).

25

## 1 **Discussion**

2           In this study, we demonstrated that the spectral distribution and CCT of ambient  
3 “white” artificial light can affect the recovery from form-deprivation myopia in a chicken  
4 model. Irrespective of the CCT, both of the full-spectrum LED lights tested in this study  
5 (4000K and 6500K) accelerated recovery from the excessive axial elongation due to form-  
6 deprivation, more completely than did isoluminant fluorescent light. None of the lights tested,  
7 however, halted the development of form-deprivation myopia, and only the higher-CCT  
8 continuous-spectrum LED light (6500K) promoted recovery from myopic refractive error to  
9 the extent that there was no significant difference in refraction between the FD and control  
10 eyes at the end of the experimental protocol. Furthermore, FD eyes of chicks reared under the  
11 higher-CCT continuous-spectrum LED light (6500K) had thicker choroids than FD eyes  
12 exposed to fluorescent light, and did not exhibit any choroidal thinning during the  
13 development of form-deprivation myopia. In parallel with our anatomical and refraction  
14 assessments, *ex vivo* SEM analysis revealed a significant increase in the thickness of scleral  
15 collagen fibres in recovering FD eyes exposed to the 6500K light compared to eyes exposed  
16 to the other lighting conditions. Whether a causal relationship exists between changes in  
17 scleral and choroidal morphology under 6500K light and recovery from FD myopia under  
18 this light requires further exploration.

19           Epidemiological investigations have highlighted the protective effect of spending time  
20 outdoors (exposure to sunlight) against human myopia [14]. These findings were  
21 complemented by experimental research in animal models. For instance, Ashby et al. [28]  
22 demonstrated that chicks fitted with diffusers that were removed daily for 15 minutes to  
23 expose under sunlight (~30,000 lux) significantly reduced the excessive increase in axial  
24 length, when compared to 15 minutes exposure to normal laboratory light (~500 lux).  
25 Similarly, exposure of young rhesus monkeys to high-intensity sunlight (average ~40,000

1 lux) inhibited the myopic shift induced by monocular -3.0 D lenses as well as the small shift  
2 away from hyperopia in fellow control eyes [29]. This protective effect against physiological  
3 and experimental myopia might be attributed to any one of many characteristics of sunlight,  
4 such as high intensity and full spectral composition [30]. While many investigations have  
5 focused on the impact of intense light on experimental myopia development [31–35], only a  
6 few have investigated the impact of the spectral characteristics of ambient, moderate  
7 intensity, visible white light on refractive error development [19,36]. In our current  
8 investigation, the improved recovery from form-deprivation myopia under moderate light  
9 levels could be attributed to the spectral content and distribution of Sunlike LEDs, which are  
10 similar to those of sunlight. Sunlike LEDs, however, did not stop the development of form-  
11 deprivation myopia. These findings are in agreement with Li *et al.* [19], who reported no  
12 significant effect of full-spectrum halogen light on refractive error development, in eyes  
13 having unrestricted vision compared to eyes having lens-induced myopia. Nevertheless, there  
14 are critical differences between our study and that of Li *et al.* [19]. For instance, our study  
15 used a form-deprivation myopia model, while the latter used lens-induced myopia. The  
16 mechanisms underlying these two myopia models are different in some aspects. [37]. In  
17 addition, unlike Li *et al.* [19] we also investigated the effect of moderate levels of full-,  
18 continuous-spectrum light during the recovery phase, and the Sunlike LED spectra used in  
19 this study were different from that of Halogen light used by Li *et al.* [19].

20 While both SL-4000 and SL-6500 lights were capable of accelerating recovery from  
21 excessive axial elongation, only SL-6500 produced complete recovery from the induced  
22 myopic refractive error by 14 days after the termination of form deprivation (day 28 of the  
23 experiment). This additional and peculiar impact of SL-6500 could be attributed to its blue-  
24 enriched spectrum (Figure 1B), similar to the spectrum of sunlight around noontime. Ocular  
25 growth and emmetropization are dependent upon chromatic cues [38], and exposure to

1 monochromatic blue light has been shown to induce hyperopia in some animal models (e.g.,  
2 chickens [20,21,39] and guinea pigs [22,40]) but not others (e.g., tree shrews [41] and  
3 monkeys [25,42]). Previous reports have also suggested a protective effect of blue-enriched  
4 white light (CCT > 9000K) against excessive axial elongation in form-deprivation myopia in  
5 chickens [36]. Whether this protective effect of blue-enriched light is due to longitudinal  
6 chromatic aberration [43] or other phenomena, remains to be clarified. According to Rucker  
7 *et al.* [44] the spectral composition of broad-spectrum light, might influence emmetropization  
8 and myopia development by retinal mechanisms (circuitry) sensitive either to wavelength per  
9 se, or to wavelength-selective defocus due to longitudinal chromatic aberration. However, the  
10 emmetropization process can be facilitated by exposure to different visual environment,  
11 presenting visual stimuli over broad spectral and temporal ranges and rich in S-cone contrast.  
12 These are supposed to be the characteristics of an outdoor lighting environment, mimicked  
13 here by Sunlike LEDs.

14 Choroidal thinning is a particular anatomical change related to myopia, whether in  
15 humans [45,46] or animal models [36,47]. In our study, form-deprivation induced choroidal  
16 thinning in FD eyes exposed to fluorescent light and SL-4000. However, the choroid was  
17 thicker overall in FD eyes exposed to SL-6500 than in those exposed to fluorescent light, and  
18 there was no choroidal thinning under SL-6500 during form-deprivation [48]. While it has  
19 already been reported that intense light (15,000 lux) induces choroidal thickening in chickens  
20 [49], here we have shown that choroidal thickening in healthy and recovering FD eyes is also  
21 dependent upon the spectral composition of light. After terminating form-deprivation, the  
22 choroids of recovering FD eyes became considerably thicker, irrespective of the lighting  
23 condition. This increase in choroidal thickness is considered a compensatory mechanism for  
24 the resultant refractive error [47] and has been attributed to changes such as the expansion of  
25 choroidal lacunae, increase in choroidal capillary permeability, proteoglycans production,



1 aqueous humor outflow through uveo-scleral routes into the choroid, and decreased tone of  
2 the choroidal smooth muscle [50,51].

3 One of the potential pathways for light-driven myopia-control is through retinal  
4 signalling molecules, acting via the retinal pigment epithelium and choroid to regulate scleral  
5 structure and biomechanics [52]. In mammals, the sclera encompasses ~80% of the eye-wall  
6 and is recognized as the main load-bearing tissue of the eye; this is achieved through closely  
7 packed collagen fibres [53]. Earlier studies on both humans and animals have shown that  
8 alterations to collagen micro-architecture and subsequent impact on biomechanical properties  
9 of sclera may also contribute to the myopia development [54,55]. In addition, a recent meta-  
10 analysis of genome wide association study comprising 160,420 participants of mixed  
11 ethnicity (European and Asian) revealed 140 genetic associations linked with light-dependent  
12 pathways, which include genes involved in glutamate receptor signalling (*GNB3*) and  
13 dopaminergic actions (*DRD1*). These are involved in the light-dependent retina-to-sclera  
14 signalling cascade, and therefore are potentially involved in the visual regulation of ocular  
15 growth [56]. Furthermore, Kusakari *et al.* [57] demonstrated that diameter of the collagen  
16 fibres at the posterior pole of form-deprived eyes were smaller when compared to controls. In  
17 the present study, we report that the exposure of recovering FD eyes to high-CCT, full-  
18 spectrum SL-6500 light is possibly associated with thicker scleral collagen fibres. Additional  
19 studies dedicated to the impact of spectrally tuned light on scleral structure and biomechanics  
20 are warranted to better understand light-driven myopia control.

21 Our study has a few limitations. First, the effect of CCT could not be explained  
22 clearly, because we selected LEDs having closely related CCT (4000K and 6500K). These  
23 two CCTs, however, were selected to mimic a real-world lighting setup; the impact of higher  
24 CCT full-spectrum light mimicking sunlight under a blue sky (~10,000K) deserves further  
25 investigation. Second, we compared the impact of broad-, full-spectrum Sunlike LEDs to that

1 of discontinuous-spectrum fluorescent light. Future studies should compare the effects of  
2 Sunlike LEDs to those of standard LEDs used in households. Finally, owing to differences in  
3 the ocular systems of chicks and humans, our findings are not directly translatable to  
4 understanding and treating human myopia. Future studies, benefitting from insights provided  
5 by non-primate animal studies such as ours, should investigate the impact of full-spectrum  
6 high CCT lighting on ocular growth in primate models.

7

## 8 **Conclusion**

9 This study, using the chicken model of form-deprivation myopia, reveals that  
10 moderate levels of continuous-, full-spectrum LED lights that mimic sunlight can promote  
11 recovery from myopia after restoring normal viewing; and that full-spectrum light with  
12 higher CCT can prevent the choroidal thinning that accompanies myopia. Our findings  
13 provide evidence that the spectral composition of indoor light could affect ocular growth and  
14 and emmetropization, and they open new research avenues for light-centred, passive myopia-  
15 control.

16

## 17 **List of abbreviations**

18 ACD: Anterior chamber depth

19 AL: Axial length

20 CAM-L: Cornea anterior module-low magnification

21 CCT: Correlated colour temperature

22 CTR: Control

23 DL: Daylight/sunlight

24 FD: Form-deprived

1 FE-SEM: Field Emission Scanning Electron Microscopy

2 FL: Fluorescent

3 HMDS: Hexamethyldisilazane

4 LEDs: Light-emitting diodes

5 RM-ANOVA: Repeated measure-analysis of variance

6 SD: Standard deviation

7 SD-OCT: Spectral-domain optical coherence tomography

8 SL: Sunlike

9

## 10 **Declarations**

### 11 **Ethics approval and consent to participate**

12 All animals used in this study were treated in accordance with the ARVO Statement  
13 for the Use of Animals in Ophthalmic and Vision Research. Protocols used were approved by  
14 the SingHealth Institutional Animal Care and Use Committee (IACUC; AAALAC  
15 Accredited; 2018/SHS/1444).

### 16 **Consent for publication**

17 Not applicable

### 18 **Availability of data and materials**

19 The datasets used in the current study are available from the corresponding author on  
20 request.

### 21 **Competing interest**

22 Authors have no conflict of interest to disclose.

### 23 **Funding**

1           This work was supported by a research grant from Seoul Semiconductor Co Ltd.  
2 (JTPHMR156900) to R.P.N. The funding organization has no role in the design, conduct and  
3 interpretation of the research.

4

#### 5 **Authors contributions**

6           R.P.N. designed research; A.R.M., S.L.W.Y. and L.Y.C. performed research; A.R.M.,  
7 R.P.N. and S.L.W.Y. analysed data; A.R.M. and S.L.W.Y wrote the paper; R.P.N., S.M.S.,  
8 V.A.B. and D.M. provided critical inputs; all authors reviewed the paper and R.P.N., acquired  
9 funding.

10

#### 11 **Acknowledgements**

12           We would like to thank Prof. William Stell for his advice and for reviewing this  
13 manuscript. We also thank Dr. Royston Tan for 3D printing the chicken diffusers and Mr.  
14 Noel Sng for helping us in designing the chicken enclosure.

15

16

17

18

19

20

## 1   **References**

- 2   1.    Zhang Y, Wildsoet CF. Chapter thirteen - RPE and choroid mechanisms underlying ocular  
3       growth and myopia. In: Hejtmancik JF, Nickerson JMBT-P in MB and TS, editors. *Molecular*  
4       *Biology of Eye Disease*. Academic Press; 2015. p. 221–40.
- 5   2.    Holden BA, Fricke TR, Wilson DA, Jong M, Naidoo KS, Sankaridurg P, et al. Global  
6       prevalence of myopia and high myopia and temporal trends from 2000 through 2050.  
7       *Ophthalmology*. 2016;123(5):1036–42.
- 8   3.    Chua SYL, Foster PJ. The economic and societal impact of myopia and high myopia bt -  
9       updates on myopia: a clinical perspective. In: Ang M, Wong TY, editors. *Singapore: Springer*  
10      *Singapore*; 2020. p. 53–63.
- 11 4.    Zheng YF, Pan CW, Chay J, Wong TY, Finkelstein E, Saw SM. The economic cost of myopia  
12      in adults aged over 40 years in Singapore. *Invest Ophthalmol Vis Sci*. 2013;54(12):7532–7.
- 13 5.    Rudnicka AR, Kapetanakis V V, Wathern AK, Logan NS, Gilmartin B, Whincup PH, et al.  
14      Global variations and time trends in the prevalence of childhood myopia, a systematic review  
15      and quantitative meta-analysis: implications for aetiology and early prevention. *Br J*  
16      *Ophthalmol*. 2016 Jul;100(7):882–90.
- 17 6.    Spillmann L. Stopping the rise of myopia in Asia. *Graefe’s Arch Clin Exp Ophthalmol*. 2020  
18      May;258(5):943–59.
- 19 7.    Holden BA, Wilson DA, Jong M, Sankaridurg P, Fricke TR, Smith EL, et al. Myopia: A  
20      growing global problem with sight-threatening complications. *Community Eye Health*. 2015;  
21      28(90): 35.
- 22 8.    Walline JJ, Lindsley K, Vedula SS, Cotter SA, Mutti DO, Twelker JD. Interventions to slow  
23      progression of myopia in children. *Cochrane Database Syst Rev*. 2011;(12):CD004916–  
24      CD004916.
- 25 9.    Wu PC, Chen CT, Lin KK, Sun CC, Kuo CN, Huang HM, et al. Myopia prevention and  
26      outdoor light intensity in a school-based cluster randomized trial. *Ophthalmology*. 2018  
27      Aug;125(8):1239–50.
- 28 10.   Jin JX, Hua WJ, Jiang X, Wu XY, Yang JW, Gao GP, et al. Effect of outdoor activity on  
29      myopia onset and progression in school-aged children in northeast china: the sujiatun eye care  
30      study. *BMC Ophthalmol*. 2015 Dec 9;15(1):73.
- 31 11.   He M, Xiang F, Zeng Y, Mai J, Chen Q, Zhang J, et al. Effect of time spent outdoors at school  
32      on the development of myopia among children in china: a randomized clinical trial. *JAMA*.

- 1           2015 Sep 15;314(11):1142–8.
- 2   12.   Morgan IG, Xiang F, Zeng Y, Mai J, Chen Q, Zhang J, et al. Increased outdoor time reduces  
3           incident myopia - the guangzhou outdoor activity longitudinal study. *Invest Ophthalmol Vis*  
4           *Sci.* 2014; 55(13):1272
- 5   13.   Wu P-C, Tsai C-L, Wu H-L, Yang Y-H, Kuo H-K. Outdoor activity during class recess  
6           reduces myopia onset and progression in school children. *Ophthalmology.* 2013  
7           May;120(5):1080–5.
- 8   14.   Guggenheim JA, Northstone K, McMahon G, Ness AR, Deere K, Mattocks C, et al. Time  
9           outdoors and physical activity as predictors of incident myopia in childhood: a prospective  
10           cohort study. *Investig Ophthalmology Vis Sci.* 2012 May;53(6):2856–65.
- 11   15.   Donovan L, Sankaridurg P, Ho A, Chen X, Lin Z, Thomas V, et al. Myopia progression in  
12           Chinese children is slower in summer than in winter. *Optom Vis Sci.* 2012;89(8):1196–202.
- 13   16.   Lingham G, Mackey DA, Lucas R, Yazar S. How does spending time outdoors protect against  
14           myopia? A review. *Br J Ophthalmol.* 2020 May 1;104(5):593 LP – 599.
- 15   17.   Norton TT, Siegwart JT. Light levels, refractive development, and myopia - A speculative  
16           review. *Exp Eye Res.* 2013;114:48–57.
- 17   18.   Lanca C, Teo A, Vivagandan A, Htoon HM, Najjar RP, Spiegel DP, et al. The effects of  
18           different outdoor environments, sunglasses and hats on light levels: implications for myopia  
19           prevention. *Transl Vis Sci Technol.* 2019;8(4):7.
- 20   19.   Li W, Lan W, Yang S, Liao Y, Xu Q, Lin L, et al. Li, W. 2014 The effect of spectral property  
21           and intensity of light on natural refractive development and compensation to negative lenses in  
22           guinea pigs.pdf. *Investig Ophthalmol Vis Sci.* 2014;55(10):6324–32.
- 23   20.   Foulds WS, Barathi VA, Luu CD. Progressive myopia or hyperopia can be induced in chicks  
24           and reversed by manipulation of the chromaticity of ambient light. *Investig Ophthalmol Vis*  
25           *Sci.* 2013;54(13):8004–12.
- 26   21.   Wang M, Schaeffel F, Jiang B, Feldkaemper M, McFadden SA, Howlett MHC, et al. Effects  
27           of light of different spectral composition on refractive development and retinal dopamine in  
28           chicks. Vavvas DG, editor. *Invest Ophthalmol Vis Sci.* 2018 May;33(11):205–15.
- 29   22.   Jiang L, Zhang S, Schaeffel F, Xiong S, Zheng Y, Zhou X, et al. Interactions of chromatic and  
30           lens-induced defocus during visual control of eye growth in guinea pigs (*Cavia porcellus*).  
31           *Vision Res.* 2014;94:24–32.
- 32   23.   Wang F, Zhou J, Lu Y, Chu R, Torii H, Kurihara T, et al. Effects of 530 nm green light on

- 1 refractive status, melatonin, MT1 receptor, and melanopsin in the guinea pig. Tsai D-C, editor.  
2 Curr Eye Res. 2011 Dec;36(2):103–11.
- 3 24. Liu R, Hu M, He JC, Zhou XT, Dai JH, Qu XM, et al. The effects of monochromatic  
4 illumination on early eye development in rhesus monkeys. *Investig Ophthalmol Vis Sci*.  
5 2014;55(3):1901–9.
- 6 25. Smith EL, Hung LF, Arumugam B, Holden BA, Neitz M, Neitz J. Effects of long-wavelength  
7 lighting on refractive development in infant rhesus monkeys. *Investig Ophthalmol Vis Sci*.  
8 2015;56(11):6490–500.
- 9 26. Schaeffel F, Howland HC. Properties of the feedback loops controlling eye growth and  
10 refractive state in the chicken. *Vision Res*. 1991;31(4):717–34.
- 11 27. Bowmaker JK, Heath LA, Wilkie SE, Hunt DM. Visual pigments and oil droplets from six  
12 classes of photoreceptor in the retinas of birds. *Vision Res*. 1997 Aug;37(16):2183–94.
- 13 28. Ashby R, Ohlendorf A, Schaeffel F. The effect of ambient illuminance on the development of  
14 deprivation myopia in chicks. *Investig Ophthalmol Vis Sci*. 2009;50(11):5348–54.
- 15 29. Wang Y, Ding H, Stell WK, Liu L, Li S, Liu H, et al. Exposure to sunlight reduces the risk of  
16 myopia in rhesus monkeys. *PLoS One*. 2015;10(6):1–17.
- 17 30. French AN, Ashby RS, Morgan IG, Rose KA. Time outdoors and the prevention of myopia.  
18 *Exp Eye Res*. 2013 Sep;114:58–68.
- 19 31. Karouta C, Ashby RS. Correlation between light levels and the development of deprivation  
20 myopia. *Investig Ophthalmol Vis Sci*. 2015;56(1):299–309.
- 21 32. Chen S, Zhi Z, Ruan Q, Liu Q, Li F, Wan F, et al. Bright light suppresses form-deprivation  
22 myopia development with activation of dopamine d1 receptor signaling in the ON pathway in  
23 retina. *Investig Ophthalmol Vis Sci*. 2017;58(4):2306–16.
- 24 33. Lan W, Feldkaemper M, Schaeffel F. Intermittent episodes of bright light suppress myopia in  
25 the chicken more than continuous bright light. Warrant EJ, editor. *PLoS One*. 2014 Oct  
26 31;9(10):1–7.
- 27 34. Sarfare S, Yang J, Nickla DL. The effects of brief high intensity light on ocular growth in  
28 chick eyes developing myopia vary with time of day. *Exp Eye Res*. 2020; 195:108039.
- 29 35. Smith EL, Hung LF, Huang J. Protective effects of high ambient lighting on the development  
30 of form-deprivation myopia in rhesus monkeys. *Investig Ophthalmol Vis Sci*. 2012;53(1):421–  
31 8.

- 1 36. Najjar RP, Chao De La Barca JM, Barathi VA, Ho CEH, Lock JZ, Muralidharan AR, Tan  
2 RKY, Dhand C, Lakshminarayanan R, Reynier P, Milea D. Ocular growth and metabolomics  
3 are dependent upon the spectral content of ambient white light. *Sci Rep.* 2021 Apr  
4 7;11(1):7586.
- 5 37. Morgan IG, Ashby RS, Nickla DL. Form deprivation and lens-induced myopia: are they  
6 different? *Ophthalmic Physiol Opt.* 2013 May;33(3):355–61.
- 7 38. Rucker FJ. The role of luminance and chromatic cues in emmetropisation. *Ophthalmic Physiol  
8 Opt.* 2013;33(3):196–214.
- 9 39. Lin G, Taylor C, Rucker F. Effect of duration, and temporal modulation, of monochromatic  
10 light on emmetropization in chicks. *Vis Res.* 2020 Jan 1;166:12–9.
- 11 40. Qian YF, Dai JH, Liu R, Chen MJ, Zhou XT, Chu RY. Effects of the chromatic defocus  
12 caused by interchange of two monochromatic lights on refraction and ocular dimension in  
13 guinea pigs. *PLoS One.* 2013;8(5).
- 14 41. Gawne TJ, Ward AH, Norton TT. Long-wavelength (red) light produces hyperopia in juvenile  
15 and adolescent tree shrews. *Vision Res.* 2017;140:55–65.
- 16 42. Hung LF, Arumugam B, She Z, Ostrin L, Smith 3rd EL. Narrow-band, long-wavelength  
17 lighting promotes hyperopia and retards vision-induced myopia in infant rhesus monkeys. *Exp  
18 Eye Res.* 2018;176:147–60.
- 19 43. Seidemann A, Schaeffel F. Effects of longitudinal chromatic aberration on accommodation  
20 and emmetropization. *Vis Res.* 2002;42(21):2409–17.
- 21 44. Rucker FJ, Eskew RT, Taylor C. Signals for defocus arise from longitudinal chromatic  
22 aberration in chick. *Exp Eye Res.* 2020;198:108126.
- 23 45. Read SA, Fuss JA, Vincent SJ, Collins MJ, Alonso-Caneiro D. Choroidal changes in human  
24 myopia: insights from optical coherence tomography imaging. *Clin Exp Optom.* 2019  
25 May;102(3):270–85.
- 26 46. Read SA, Collins MJ, Vincent SJ, Alonso-Caneiro D. Choroidal thickness in myopic and  
27 nonmyopic children assessed with enhanced depth imaging optical coherence tomography.  
28 *Invest Ophthalmol Vis Sci.* 2013 Nov 15;54(12):7578–86.
- 29 47. Wildsoet C, Wallman J. Choroidal and scleral mechanisms of compensation for spectacle  
30 lenses in chicks. *Vision Res.* 1995;35(9):1175–94.
- 31 48. Nickla DL, Totonelly K. Choroidal thickness predicts ocular growth in normal chicks but not  
32 in eyes with experimentally altered growth. *Clin Exp Optom.* 2015 Nov;98(6):564–70.



- 1 49. Lan W, Feldkaemper M, Schaeffel F. Bright light induces choroidal thickening in chickens.  
2 Optom Vis Sci. 2013;90(11):1199–206.
- 3 50. Longo A, Geiser M, Riva CE. Subfoveal choroidal blood flow in response to light-dark  
4 exposure. Invest Ophthalmol Vis Sci. 2000;41(9):2678–83.
- 5 51. Junghans BM, Crewther SG, Liang H, Crewther DP. A role for choroidal lymphatics during  
6 recovery from form deprivation myopia? Optom Vis Sci Off Publ Am Acad Optom. 1999  
7 Nov;76(11):796–803.
- 8 52. Wallman J, Winawer J. Homeostasis of eye growth and the question of myopia. Neuron. 2004  
9 Aug 19;43(4):447–68.
- 10 53. Watson PG, Young RD. Scleral structure, organisation and disease. A review. Exp Eye Res.  
11 2004 Mar;78(3):609–23.
- 12 54. McBrien NA, Jobling AI, Gentle A. Biomechanics of the sclera in myopia: extracellular and  
13 cellular factors. Optom Vis Sci. 2009;86(1):E23–30.
- 14 55. Rada JAS, Shelton S, Norton TT. The sclera and myopia. Exp Eye Res. 2006 Feb;82(2):185–  
15 200.
- 16 56. Tedja MS, Wojciechowski R, Hysi PG, Eriksson N, Furlotte NA, Verhoeven VJM, et al.  
17 Genome-wide association meta-analysis highlights light-induced signaling as a driver for  
18 refractive error. Nat Genet. 2018;50(6):834–48.
- 19 57. Kusakari T, Sato T, Tokoro T. Visual deprivation stimulates the exchange of the fibrous sclera  
20 into the cartilaginous sclera in chicks. Exp Eye Res. 2001 Oct;73(4):533-46

21

## 22 **Figure Legends**

23 **Figure 1.** Spectral distribution of fluorescent (4000K: FL-4000), full-spectrum LED (4000K:  
24 SL-4000 and 6500K: SL-6500) light-sources, expressed in absolute (A) and relative (B)  
25 irradiance. Panel B also includes measurements of daylight/sunlight (4000K: DL-4000 and  
26 6500K: DL-6500) for relative comparison of spectral distribution between artificial and  
27 natural sunlight C. The average (mean  $\pm$ SD) light transmittance of 10 diffusers used in this  
28 study.

29

1 **Figure 2.** Axial length of FD and control eyes in animals raised under FL-4000 (n = 18) (A),  
2 SL-4000 (n = 12) (B), and SL-6500 (n = 9) (C); and inter-ocular differences in axial length of  
3 eyes in chicks exposed to FL-4000, SL-4000 and SL-6500 (D). Shaded area between D1 and  
4 D14 indicates the period of form-deprivation. &: Significant inter-group difference ( $P =$   
5 0.02), for FL-4000 vs both SL-4000 and SL-6500 (both:  $P = 0.04$ ); \$: at D22, inter-ocular  
6 difference in axial length was significantly higher in FD eyes exposed to FL-4000 than in  
7 those exposed to SL-4000 ( $P < 0.001$ ) or SL-6500 ( $P < 0.01$ ); and #: at D28, inter-ocular  
8 difference in axial length was significantly higher in FD eyes exposed to FL-4000 than in  
9 eyes exposed to SL-4000 ( $P < 0.001$ ) or SL-6500 ( $P < 0.001$ ).  $*(P < 0.05)$ ,  $***(P < 0.001)$ .  
10 CTR: Control; FD: Form-deprivation. Data are represented as average  $\pm$  SD.

11

12 **Figure 3.** Refractive status of FD and fellow control eyes in animals raised under FL-4000 (n  
13 = 18) (A), SL-4000 (n = 12) (B), and SL-6500 (n = 9) (C), and inter-ocular differences in  
14 refractive status of eyes exposed to FL-4000, SL-4000 and SL-6500 (D). Statistical  
15 significance  $*(P < 0.05)$   $** (P < 0.005)$ ,  $*** (P < 0.001)$ . CTR-Control and FD-Form-  
16 deprivation. Shaded area between D1-D14 time points indicates the period of form-  
17 deprivation. Data are represented as average  $\pm$  SD.

18

19 **Figure 4.** Changes in choroidal thickness of FD and fellow control eyes in animals raised  
20 under FL-4000 (n = 18) (A), SL-4000 (n = 12) (B), SL-6500 (n = 9) (C), and inter-ocular  
21 differences in choroidal thickness of eyes in chicks exposed to FL-4000, SL-4000 and SL-  
22 6500 (D). Statistical significance  $*** (P < 0.001)$ ; #: The inter-ocular difference in choroidal  
23 thickness in recovering FD eyes exposed to SL-6500 was significantly higher than in those  
24 exposed to FL-4000 ( $P = 0.03$ ). CTR: Control; FD: Form-deprivation. Shaded area between  
25 D1-D14 indicates the period of form-deprivation. Data are represented as average  $\pm$  SD.

1

2 **Figure 5.** Changes in the anterior chamber depth of FD and fellow control eyes, in animals  
3 raised under FL-4000 (n = 18) (A), SL-4000 (n = 12) (B), SL-6500 (n = 9) (C); and inter-  
4 ocular differences in ACD of eyes exposed to FL-4000, SL-4000 and SL-6500 (D). ACD:  
5 Anterior chamber depth; CTR: Control eyes; FD: Form-deprivation. Shaded area between  
6 D1-D14 indicates the period of form-deprivation. Data are represented as average  $\pm$  SD;  
7 \*\*\*( $P < 0.001$ ).

8

9 **Figure 6.** Representative scanning electron micrographs of scleral collagen fibres in the  
10 experimental groups (FL-4000, SL-4000 and SL-6500) (A-C and E-G). Average thickness of  
11 the scleral collagen fibres from control eyes (D) and FD eyes (H) of different experimental  
12 groups (n = 6). \*( $P < 0.05$ ), \*\*( $P < 0.01$ ).

13

14 **Supplementary Figure S1.** Average weight of animals in experimental groups raised under  
15 FL-4000 (n = 18), SL-4000 (n=12) and SL-6500 (n = 9) throughout the experiment. Shaded  
16 area between D1 and D14 indicates the period of form-deprivation. Data are represented as  
17 average  $\pm$  SD. Body weights at all durations were not significantly different, and were not  
18 affected by FD or recovery ( $P > 0.05$ ).

19

20 **Supplementary Figure S2.** Changes in the retinal thickness in FD and fellow control eyes in  
21 animals raised under FL-4000 (n = 18) (A), SL-4000 (n = 12) (B), SL-6500 (n = 9) (C); and  
22 inter-ocular differences in retinal thickness in eyes exposed to FL-4000, SL-4000 and SL-  
23 6500 (D). CTR: Control; FD: Form-deprivation. Shaded area (D1-D14) indicates the period  
24 of form-deprivation. Data are represented as average  $\pm$  SD; \*\*\*( $P < 0.001$ ).

25

1

2

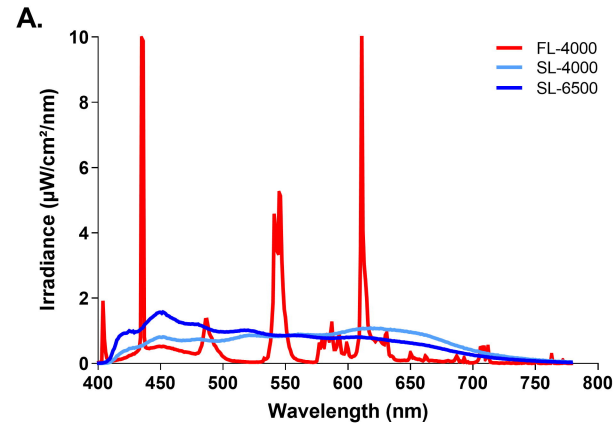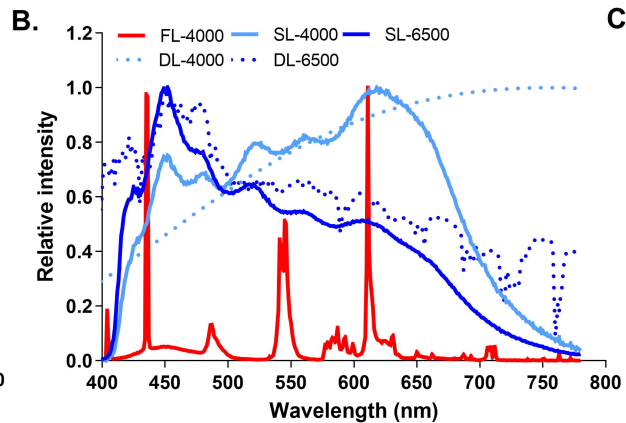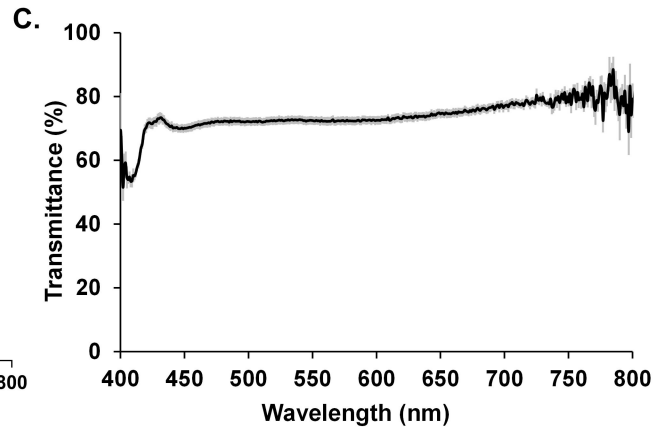

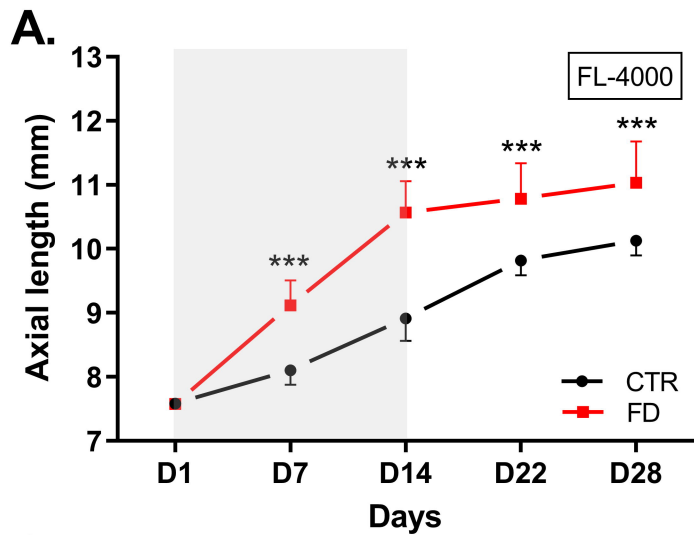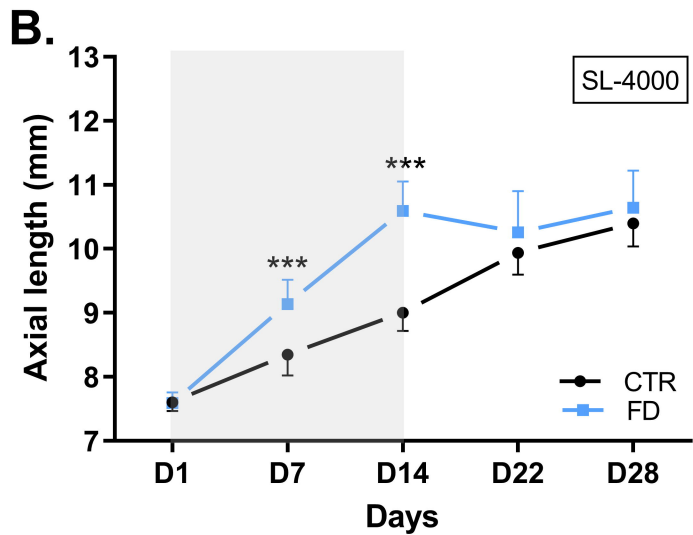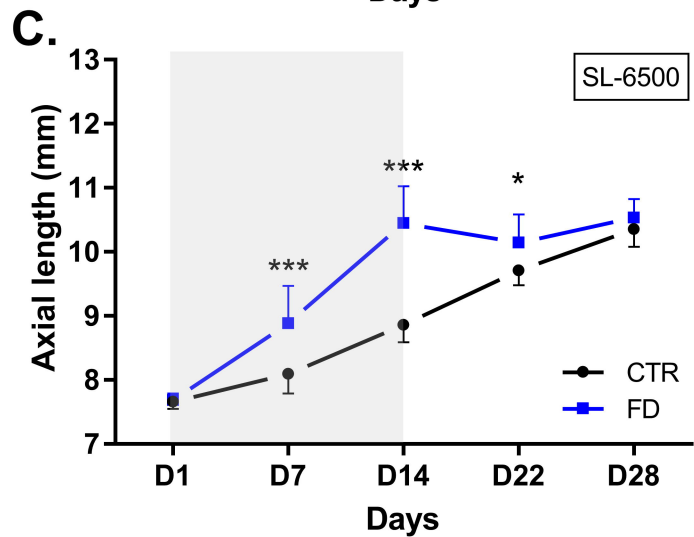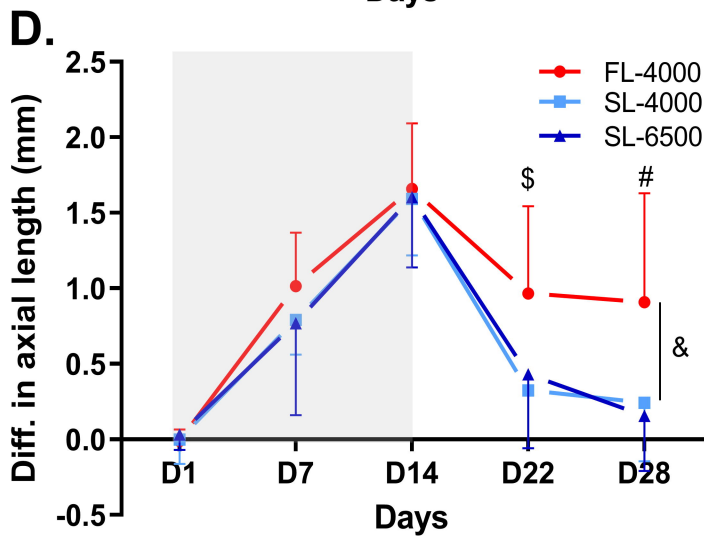

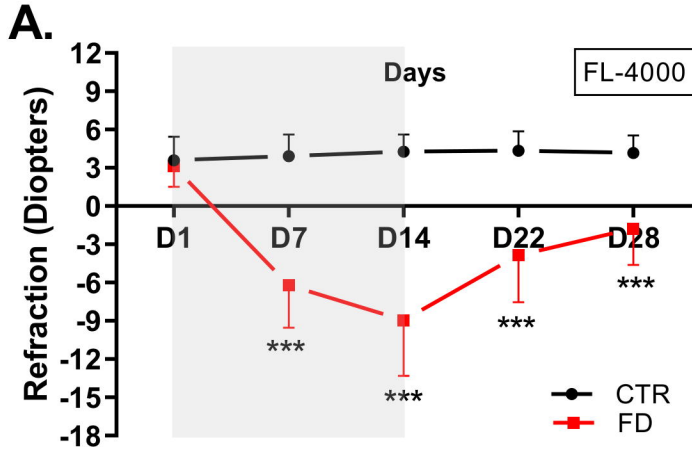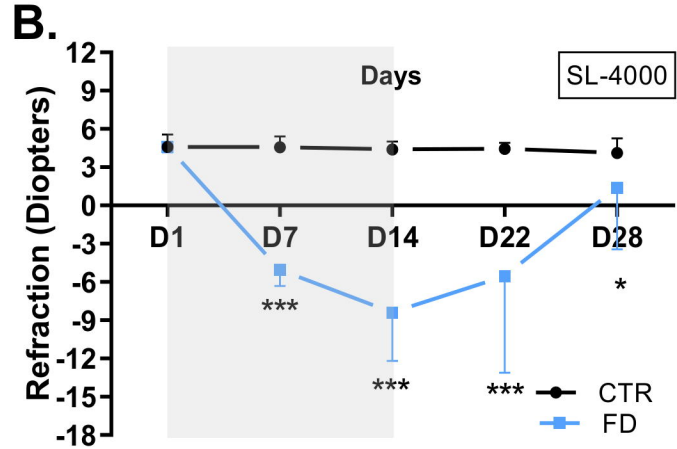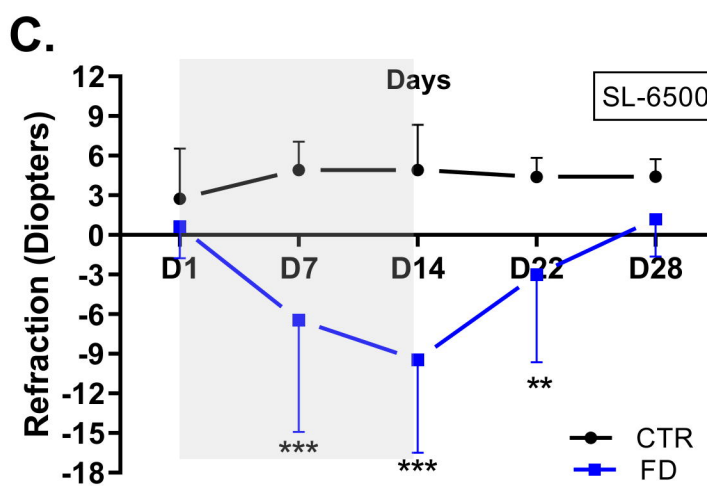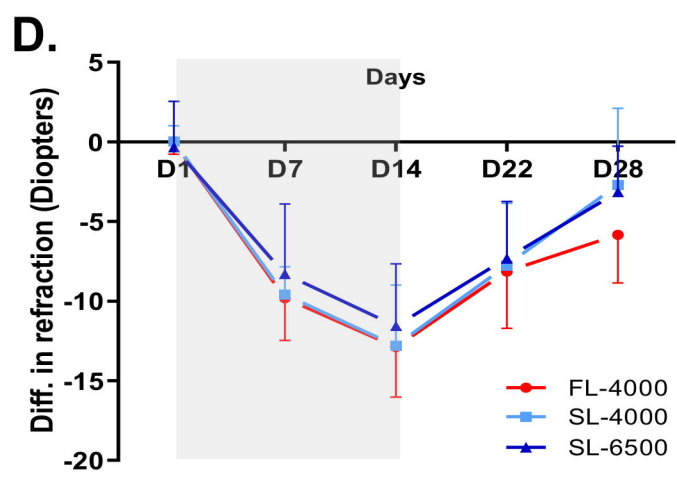

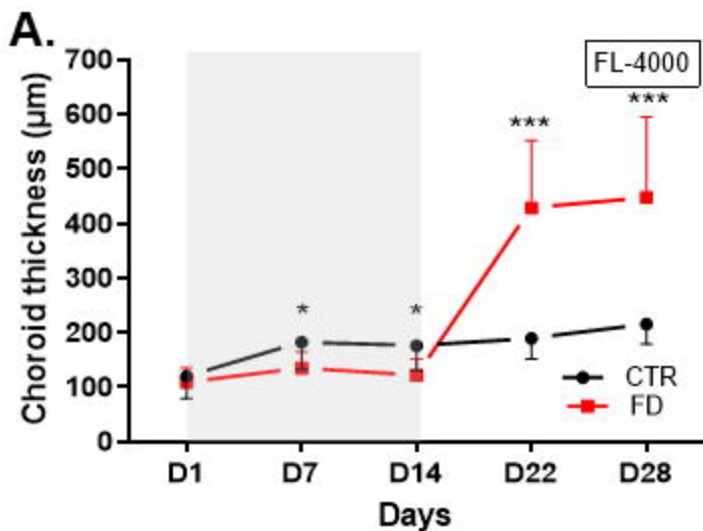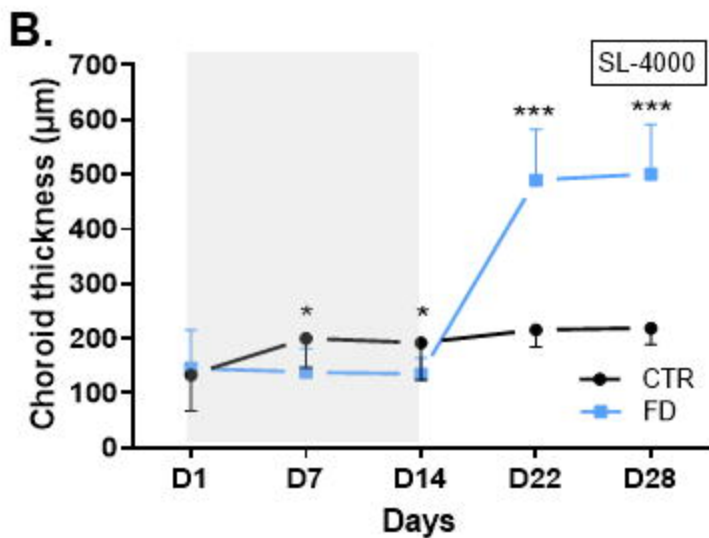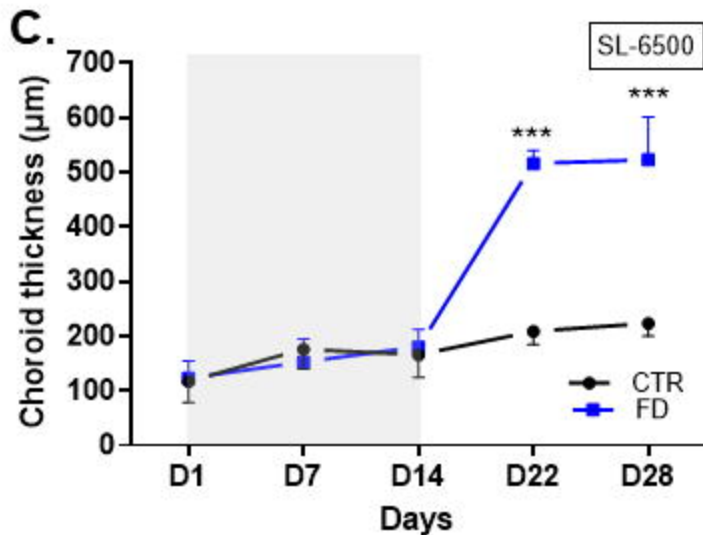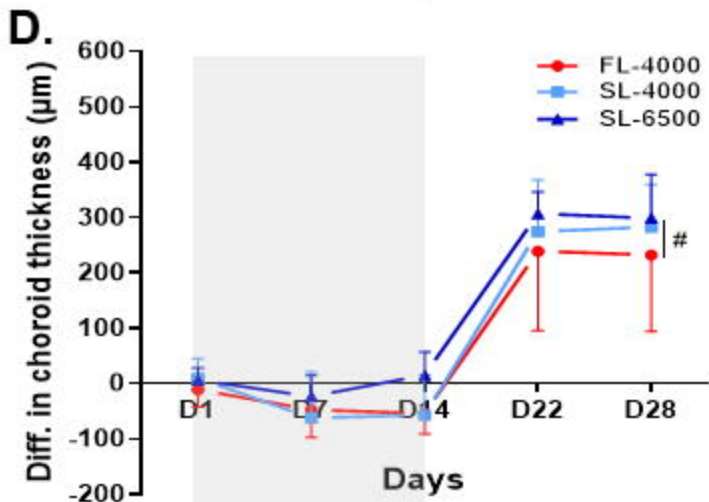



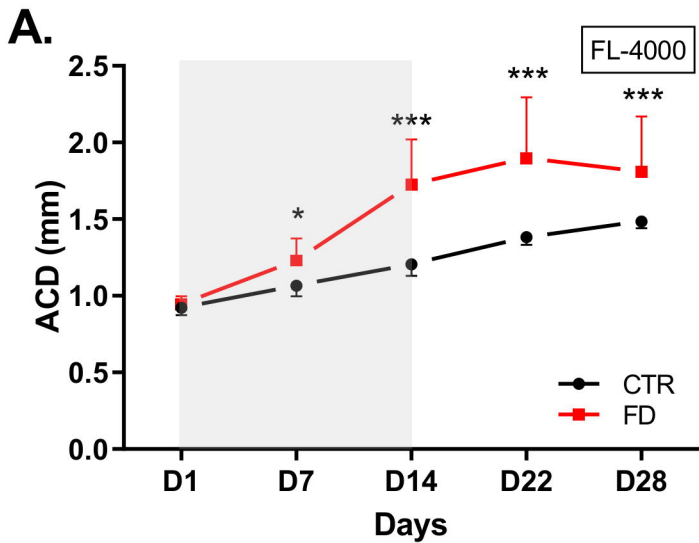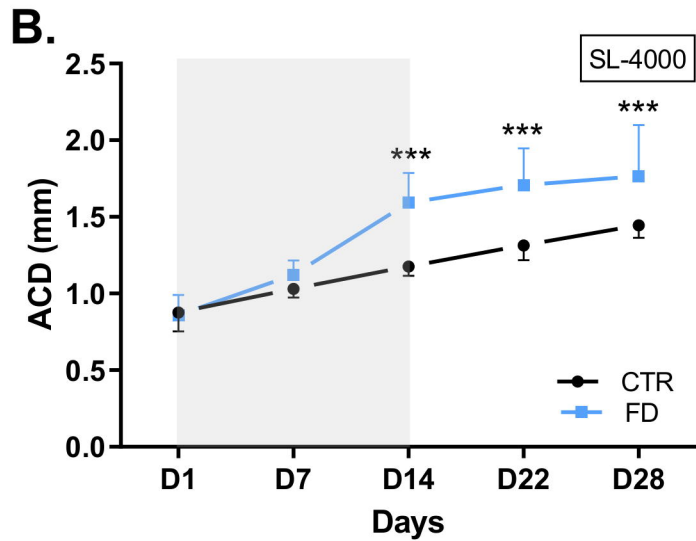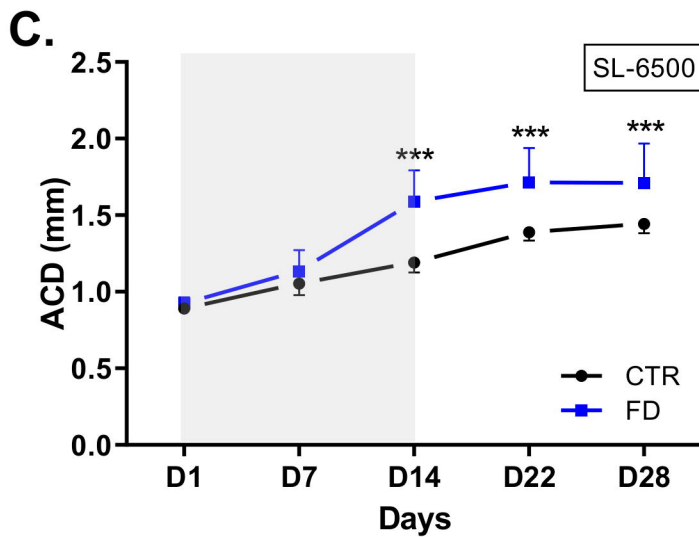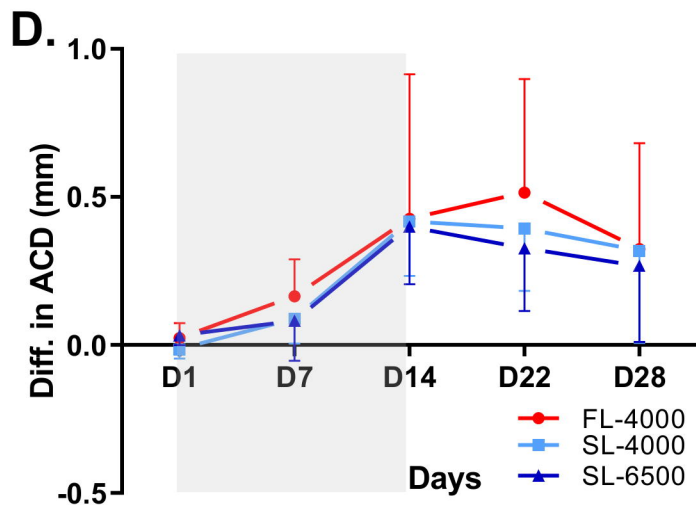

**FL-4000****SL-4000****SL-6500****A.****B.****C.****D.****CONTROL**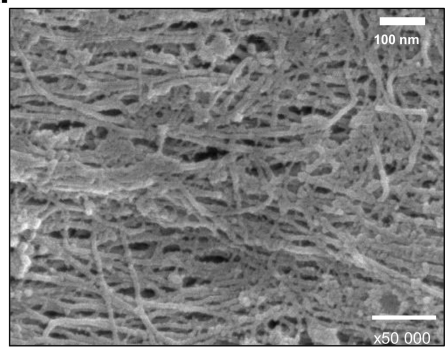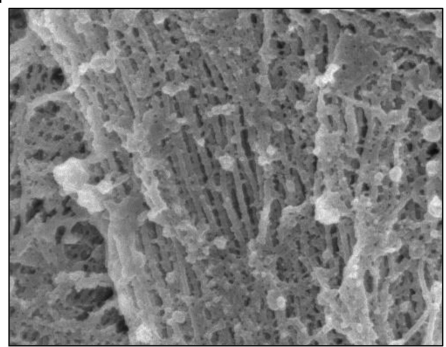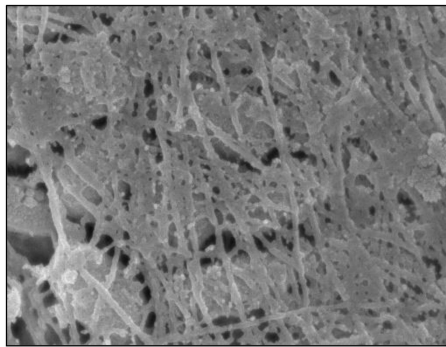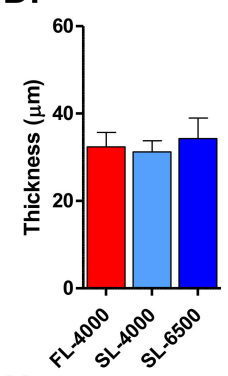**E.****F.****G.****H.****FD**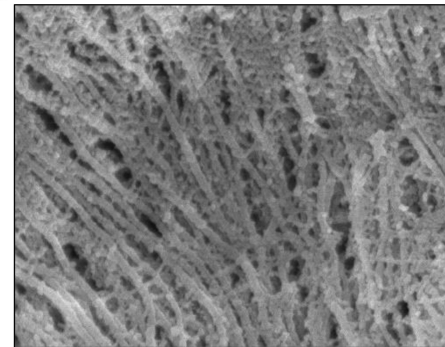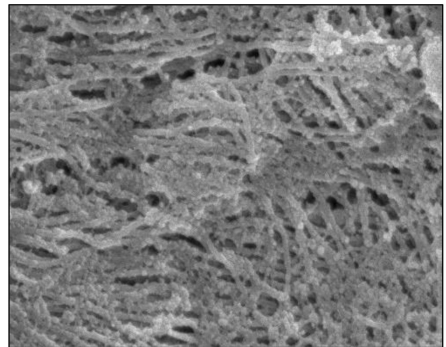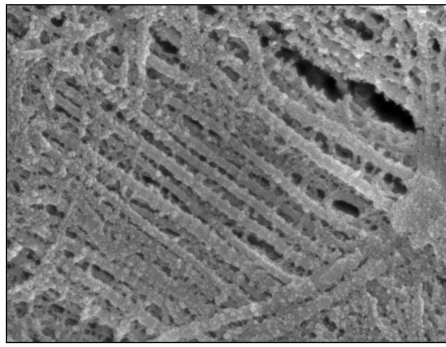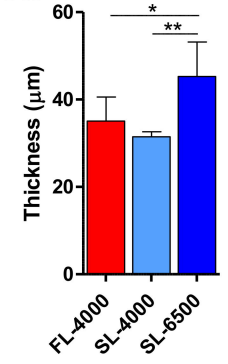

Source: http://biorxiv.org/content/10.1101/2021.04.28.441740v1.full.pdf
